# Supplementary material for: Behavior of KCl sorbent traps and KCl trapping solutions used for atmospheric mercury speciation: stability and specificity
Source: Copernicus journal article supplement (doi:10.5194/amt-14-6619-2021), 2021-10-13
Supplement: Supplementary file 1 [file amt-14-6619-2021-supplement.pdf]

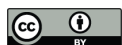

*Supplement of*

## **Behavior of KCl sorbent traps and KCl trapping solutions used for atmospheric mercury speciation: stability and specificity**

**Jan Gačnik et al.**

*Correspondence to:* Milena Horvat ([milena.horvat@ijs.si](mailto:milena.horvat@ijs.si))

The copyright of individual parts of the supplement might differ from the article licence.

1 **Table S1:** Chemicals used in the presented work

| Description                                                            | Purity / type                       | Producer                        |
|------------------------------------------------------------------------|-------------------------------------|---------------------------------|
| 65 % nitric acid                                                       | For analysis                        | Supelco, Darmstadt, Germany     |
| 30 % hydrochloric acid                                                 | Suprapur                            | Merck, Darmstadt, Germany       |
| 47 % hydrobromic acid                                                  | For analysis                        | Merck, Darmstadt, Germany       |
| Tin (II) chloride dihydrate<br>(SnCl <sub>2</sub> ·2H <sub>2</sub> O)  | For analysis, max. 0.000001 %<br>Hg | Merck, Darmstadt, Germany       |
| Gold (III) chloride hydrate<br>(HAuCl <sub>4</sub> ·xH <sub>2</sub> O) | 99.995 % trace metal basis          | Merck, Darmstadt, Germany       |
| Elemental mercury                                                      | 99.9999 % Suprapur                  | Merck, Darmstadt, Germany       |
| Sodium tetrapropylborate                                               | /                                   | Merck, Darmstadt, Germany       |
| Acetic acid                                                            | Puriss.                             | Merck, Darmstadt, Germany       |
| Ammonium acetate                                                       | LiChropur                           | Merck, Darmstadt, Germany       |
| 2,2,4-trimethylpentane                                                 | For HPLC, ≥99 %                     | Merck, Darmstadt, Germany       |
| Silica gel                                                             | Technical grade 40, 6-14 mesh       | Merck, Darmstadt, Germany       |
| Anhydrous sodium sulfate                                               | ≥99.99 % trace metal basis          | Merck, Darmstadt, Germany       |
| NIST SRM 3133: Mercury<br>(Hg) Standard Solution                       | /                                   | NIST, Gaithersburg, MD, USA     |
| <sup>196</sup> Hg enriched elemental Hg                                | 51.58 % <sup>196</sup> Hg           | Isoflex, San Francisco, CA, USA |
| Type I purified water                                                  | Electrical resistivity 18.2 MΩ cm   | Merck, Darmstadt, Germany       |

2 **Table S2:** Instruments used in the presented work

| Description                                                         | Model                                                                                 | Producer                                      |
|---------------------------------------------------------------------|---------------------------------------------------------------------------------------|-----------------------------------------------|
| High-purity germanium<br>(HPGe) coaxial-type detector               | Model 7229P                                                                           | Canberra Industries Inc.,<br>Meriden, CT, USA |
| High-purity germanium<br>(HPGe) well-type detector                  | Model GCW6023/S                                                                       | Canberra Industries Inc.,<br>Meriden, CT, USA |
| Cold vapor atomic absorption<br>spectrometer                        | Model Hg-201 Semi-Automated<br>Mercury Analyzer                                       | Sanso Seisakusho Co., Ltd.,<br>Tokyo, Japan   |
| Liquid evaporative generator<br>for oxidized mercury                | /                                                                                     | Optoseven Ltd. & VTT Ltd.,<br>Espoo, Finland  |
| Amalgamation-atomic<br>fluorescence spectrometer                    | Model PSA 10.525 Sir Galahad                                                          | P S Analytical, Orpington, UK                 |
| Temperature-controlled bath                                         | Model R2                                                                              | Grant Instruments Ltd.,<br>Cambridge, UK      |
| Bell Jar elemental Hg<br>calibrator                                 | Model PSA 10.555                                                                      | P S Analytical, Orpington, UK                 |
| Cavkit elemental Hg vapor<br>generator                              | Model PSA 10.536                                                                      | P S Analytical, Orpington, UK                 |
| Capillary gas chromatography<br>atomic fluorescence<br>spectrometry | Model PSA 10.725 with Agilent<br>J&W, DB1, 15 m 0.53 mm ID,<br>film thickness 1.50 μm | P S Analytical, Orpington, UK                 |

3 Equation S1 was applied for calculation of both  $A_0$  (activity at reference time) of the sample and  $A_0$  of the  
4 standard. The recoveries were calculated using Equation S2.

5 **Equation S1**

$$6 \quad A_{0, \text{sample}} = \frac{A_{\text{sample}} * \frac{\ln 2}{t_{1/2}}}{e^{-\left(\frac{t_{\text{passed}} * \ln 2}{t_{1/2}}\right)} * \left[1 - e^{-\left(\frac{t_{\text{measurement}} * \ln 2}{t_{1/2}}\right)}\right]}$$

7 **Equation S2**

$$8 \quad R = \frac{A_{0, \text{sample}}}{A_{0, \text{std.}}} * \frac{m_{\text{Hg, std.}}}{m_{\text{Hg, sample}}} * 100$$

9 Where:

- 10  $A_{0, sample}$  is the sample activity at reference time  $t=0$  [Bq],  
 11  $A_{0, std}$  is the standard activity at reference time  $t=0$  [Bq],  
 12  $A_{sample}$  is the sample activity at the time of measurement [Bq],  
 13  $t_{1/2}$  is the half-life of  $^{197}\text{Hg}$  [s],  
 14  $t_{passed}$  is the time passed since reference time  $t=0$  till the start of measurement [s],  
 15  $t_{measurement}$  is the time passed during the measurement [s],  
 16  $R$  is the recovery [%],  
 17  $m_{\text{Hg},std}$  is the mass of Hg used for standard [pg],  
 18  $m_{\text{Hg} sample}$  is the mass of Hg used for sample, assuming 100 % recovery [pg].
- 19 The dimensionless Henry's law constant can be calculated according to Equation S3.

20 **Equation S3**

$$k_{H'} = \frac{[Hg_{gas}]}{[Hg_{solution}]}$$

21 Where:

- 22  $k_{H'}$  is the dimensionless Henry's law constant,  
 23  $[Hg_{gas}]$  is the concentration of mercury in gas phase,  
 24  $[Hg_{solution}]$  is the concentration of mercury in liquid phase.

25

26 The true gas flow in the extractor stripping vessel,  $\overline{Q}_{(g)}$  was calculated using Equation S4.

27 **Equation S4**

$$\overline{Q}_{(g)} = Q_{(g)}^o \times \frac{T \times p_0}{(\overline{p} - p_w) \times T_0}$$

28 Where:

- 29  $T$  is the absolute temperature of the sample in the extractor,  
 30  $Q_{(g)}^o$  is the dry standard flow rate from the mass flow controller at reference conditions  $T_0$  (293.15 K) and  $p_0$  (1013.2 mbar),  
 31  $\overline{p}$  is the pressure of the headspace in the vessel,  
 32  $p_w$  is the saturated vapor pressure of the KCl at temperature of the vessel.

34 Henry's law describes the relationship between the partial pressure of a gas and the amount of that gas  
 35 species dissolved into a liquid phase. The ratio of the two is constant for a given system (temperature, gas  
 36 species and liquid phase composition). For low gas-phase concentrations, the gas to liquid concentration ratio  
 37 (in matrix independent units) can be used (Equation S3), with the constant of proportionality,  $k_{H'}$ , called the  
 38 dimensionless Henry's law constant (HLC). (Saxholm et al., 2020)

39 Assuming equilibrium between elemental Hg in the aqueous and gas phases and considering Henry's law,  
 40 the differential equation (Equation S5) can be applied, which describes the rate of decrease of  $\text{Hg}^0$  dissolved in  
 41 the aqueous phase as it is stripped out into the flowing gas.

42 **Equation S5**

$$\frac{dC_{aq}}{dt} = - \frac{\overline{Q}_{(g)} \times k_{H'} \times C_{aq}}{V_{solv}}$$

43 Where:

- 44  $C_{aq}$  is the Hg concentration in the solvent,  
 45  $V_{solv}$  is the volume of solvent in the extractor.

46 Solving Equation S5 gives Equation S6.

47 **Equation S6**

$$\frac{C_{aq}}{C_0} = e^{-\frac{\overline{Q}_{(g)} \times t \times k_{H'}}{V_{solv}}}$$

48 Equation S6 can be expressed as Equation S7 and Equation S8

49 **Equation S7**

$$C_{aq} = C_0 \times e^{-\alpha}$$

50 Where:

51 **Equation S8**

$$\alpha = \frac{\overline{Q_{(g)}} \times t \times k_{Hf}}{V_{solv}} = \frac{V_{(g)} \times k_{Hf}}{V_{solv}}$$

52 The amount of Hg collected during every extraction depends on the volume of gas and the volume of  
53 solution. During each successive extraction ( $n = 1, 2, 3 \dots$ ) of the same period the concentration of mercury in  
54 solution can be calculated using Equation S9.

55 **Equation S9**

$$C_{aq}(n) = C_0 \times e^{-n\alpha}$$

56 The mass of mercury collected from the gas phase,  $m_{Hg}(n)$ , during extraction  $n$  is the difference between  
57 the mass of Hg in solution after the extraction ( $n - 1$ ) and the mass of Hg in solution after extraction  $n$ , which  
58 can be expressed as Equation S10.

59 **Equation S10**

$$m_{Hg}(n) = V_{solv} \times C_{aq}(n - 1) - V_{aq} \times C_{aq}(n)$$

60 Equation S10 can also be expressed as Equation S11.

61 **Equation S11**

$$m_{Hg}(n) = V_{solv} \times C_0 \times (e^\alpha - 1) - e^{-n\alpha}$$

62 The natural logarithm of Equation S11 is expressed in Equation S12.

63 **Equation S12**

$$\ln(m_{Hg}(n)) = -(n \times \alpha) + \ln(V_{solv} \times C_0 \times (e^\alpha - 1))$$

64 Therefore, a graph of  $\ln(m_{Hg}(n))$  against  $n$  has a slope of  $-\alpha$  and an intercept of  $\ln(V_{solv} \times C_0 \times (e^\alpha - 1))$ .  
65 If both  $V_{solv}$  and  $V_{(g)}$  are known, the dimensionless HLC can be calculated from  $\alpha$  using Equation S8.

66 Table S3 shows the temperature program that was used for determination of oxidized Hg in KCl trapping  
67 solutions by gas chromatography with atomic fluorescence detection (GC-AFS).

68 **Table S3: GC-AFS temperature program.**

| Stage | Start temperature [°C] | Ramp [°C min <sup>-1</sup> ] | End temperature [°C] | Hold [min] |
|-------|------------------------|------------------------------|----------------------|------------|
| 1     | 30                     | /                            | 30                   | 2          |
| 2     | 30                     | 20                           | 80                   | 0          |
| 3     | 80                     | 50                           | 120                  | 1          |
| 4     | 120                    | 100                          | 280                  | 4          |

69

**Table S4:** Results of the stability test for the  $^{197}\text{Hg}^{2+}$  (radiotracer) spike on KCl crystal. Low concentrations were loaded with less than 1 ng Hg per time period and high concentrations were loaded with more than 50 ng of Hg per time period. Low air flow experiments were performed with  $100 \text{ mL min}^{-1}$  air flow while high air flow experiments were performed with  $400 \text{ mL min}^{-1}$  flow.

| Species         | Concentration | Gas flow | Time period      | 0.0 - 0.5 h | 0.5 – 1.0 h | 1.0 - 1.5 h | 1.5 – 2.0 h | 2.0 – 2.5 h |
|-----------------|---------------|----------|------------------|-------------|-------------|-------------|-------------|-------------|
| $\text{HgCl}_2$ | High          | High     | Average loss (%) | 0.92        | 0.67        | 0.57        | 0.61        | ×           |
|                 |               |          | SD (%)           | 0.52        | 0.46        | 0.14        | 0.23        | ×           |
|                 |               |          | RSD              | 56.7        | 68.6        | 24.0        | 37.9        | ×           |
|                 |               | Low      | Average loss (%) | 2.43        | 0.21        | 0.03        | 0.12        | 0.03        |
|                 |               |          | SD (%)           | 1.45        | 0.26        | 0.03        | 0.10        | 0.03        |
|                 |               |          | RSD              | 59.8        | 126         | 115         | 86.6        | 88.4        |
|                 | Low           | High     | Average loss (%) | 2.01        | 0.80        | 1.04        | 1.00        | 0.69        |
|                 |               |          | SD (%)           | 1.25        | 1.07        | 1.50        | 1.70        | 1.04        |
|                 |               |          | RSD              | 62.1        | 133         | 143         | 169         | 152         |
| $\text{HgBr}_2$ | High          | High     | Average loss (%) | 0.04        | 0.01        | 0.02        | 0.02        | 0.00        |
|                 |               |          | SD (%)           | 0.05        | 0.03        | 0.02        | 0.02        | 0.00        |
|                 |               |          | RSD              | 104         | 199         | 100         | 118         | 0.00        |
|                 |               | Low      | Average loss (%) | 0.02        | 0.09        | 0.04        | 0.00        | ×           |
|                 |               |          | SD (%)           | 0.03        | 0.03        | 0.06        | 0.00        | ×           |
|                 |               |          | RSD              | 173         | 31.9        | 173         | 509         | ×           |
|                 | Low           | High     | Average loss (%) | 0.95        | 0.17        | 0.03        | 0.13        | 0.00        |
|                 |               |          | SD (%)           | 0.76        | 0.17        | 0.05        | 0.21        | 0.00        |
|                 |               |          | RSD              | 80.1        | 103         | 173         | 154         | 173         |

**Table S5.** Results of the stability test for the calibrator loading of  $^{197}\text{Hg}^{2+}$  (radiotracer) on KCl crystal. Low concentrations were loaded with less than 1 ng Hg per time period and high concentrations were loaded with more than 50 ng of Hg per time period. Low air flow experiments were performed with  $100 \text{ mL min}^{-1}$  air flow while high air flow experiments were performed with  $400 \text{ mL min}^{-1}$  flow.

| Species         | Concentration | Gas flow | Time period      | 0.0 - 0.5 h | 0.5 – 1.0 h | 1.0 - 1.5 h | 1.5 – 2.0 h | 2.0 – 2.5 h |
|-----------------|---------------|----------|------------------|-------------|-------------|-------------|-------------|-------------|
| $\text{HgCl}_2$ | High          | High     | Average loss (%) | 0.27        | 0.01        | 0.01        | 0.02        | ×           |
|                 |               |          | SD (%)           | 0.27        | 0.00        | 0.01        | 0.02        | ×           |
|                 |               |          | RSD              | 101         | 41.9        | 141         | 141         | ×           |
|                 |               | Low      | Average loss (%) | 0.03        | 0.01        | 0.01        | 0.01        | ×           |
|                 |               |          | SD (%)           | 0.02        | 0.01        | 0.02        | 0.01        | ×           |
|                 |               |          | RSD              | 72.1        | 94.6        | 165         | 72.9        | ×           |
|                 | Low           | High     | Average loss (%) | 2.37        | 1.50        | 0.33        | 0.02        | ×           |
|                 |               |          | SD (%)           | 0.61        | 1.06        | 0.56        | 0.02        | ×           |
|                 |               |          | RSD              | 25.7        | 70.7        | 173         | 97.0        | ×           |
| $\text{HgBr}_2$ | High          | High     | Average loss (%) | 0.04        | 0.01        | 0.01        | 0.01        | ×           |
|                 |               |          | SD (%)           | 0.02        | 0.01        | 0.00        | 0.01        | ×           |
|                 |               |          | RSD              | 41.7        | 70.3        | 18.9        | 43.7        | ×           |
|                 |               | Low      | Average loss (%) | 0.03        | 0.02        | 0.02        | 0.02        | ×           |
|                 |               |          | SD (%)           | 0.02        | 0.02        | 0.02        | 0.02        | ×           |
|                 |               |          | RSD              | 78.2        | 103         | 85.1        | 82.2        | ×           |
|                 | Low           | High     | Average loss (%) | 1.86        | 0.19        | 0.10        | 0.18        | ×           |
|                 |               |          | SD (%)           | 0.95        | 0.33        | 0.17        | 0.26        | ×           |
|                 |               |          | RSD              | 51.4        | 173         | 173         | 147         | ×           |

**Table S6.** Results of the stability test for the  $^{197}\text{Hg}^{2+}$  (radiotracer) spike on quartz wool impregnated with KCl. Low concentrations were loaded with less than 1 ng Hg per time period and high concentrations were loaded with more than 50 ng of Hg per time period. Low air flow experiments were performed with  $100\text{ mL min}^{-1}$  air flow while high air flow experiments were performed with  $400\text{ mL min}^{-1}$  flow.

| Species         | Concentration | Gas flow | Time period      | 0.0 - 0.5 h | 0.5 – 1.0 h | 1.0 - 1.5 h | 1.5 – 2.0 h | 2.0 – 2.5 h |
|-----------------|---------------|----------|------------------|-------------|-------------|-------------|-------------|-------------|
| $\text{HgCl}_2$ | High          | High     | Average loss (%) | 0.55        | 0.21        | 0.19        | 0.14        | 0.10        |
|                 |               |          | SD (%)           | 0.22        | 0.09        | 0.18        | 0.10        | 0.09        |
|                 |               |          | RSD              | 40.4        | 40.0        | 96.4        | 75.8        | 93.9        |
|                 |               | Low      | Average loss (%) | 0.31        | 0.18        | 0.22        | 0.12        | 0.08        |
|                 |               |          | SD (%)           | 0.17        | 0.13        | 0.28        | 0.08        | 0.10        |
|                 |               |          | RSD              | 53.1        | 76.5        | 127         | 71.6        | 115         |
|                 | Low           | High     | Average loss (%) | 1.36        | 0.17        | 0.09        | 0.02        | 0.12        |
|                 |               |          | SD (%)           | 0.47        | 0.27        | 0.10        | 0.04        | 0.05        |
|                 |               |          | RSD              | 34.8        | 164         | 109         | 173         | 40.2        |
| $\text{HgBr}_2$ | High          | High     | Average loss (%) | 0.21        | 0.07        | 0.03        | 0.02        | 0.02        |
|                 |               |          | SD (%)           | 0.06        | 0.03        | 0.01        | 0.02        | 0.02        |
|                 |               |          | RSD              | 31.2        | 47.8        | 44.7        | 122         | 121         |
|                 |               | Low      | Average loss (%) | 0.23        | 0.18        | 0.03        | 0.02        | 0.01        |
|                 |               |          | SD (%)           | 0.18        | 0.12        | 0.04        | 0.02        | 0.01        |
|                 |               |          | RSD              | 77.1        | 68.6        | 131         | 90.5        | 86.9        |
|                 | Low           | High     | Average loss (%) | 1.59        | 0.32        | 0.25        | 0.11        | 0.08        |
|                 |               |          | SD (%)           | 1.21        | 0.35        | 0.22        | 0.08        | 0.06        |
|                 |               |          | RSD              | 76.1        | 107         | 87.3        | 74.6        | 75.1        |

**Table S7.** Results of the stability test for the calibrator loading of  $^{197}\text{Hg}^{2+}$  (radiotracer) on quartz wool impregnated with KCl. Low concentrations were loaded with less than 1 ng Hg per time period and high concentrations were loaded with more than 50 ng of Hg per time period. Low air flow experiments were performed with  $100 \text{ mL min}^{-1}$  air flow while high air flow experiments were performed with  $400 \text{ mL min}^{-1}$  flow

| Species         | Concentration | Gas flow | Time period      | 0.0 - 0.5 h | 0.5 – 1.0 h | 1.0 - 1.5 h | 1.5 – 2.0 h | 2.0 – 2.5 h |
|-----------------|---------------|----------|------------------|-------------|-------------|-------------|-------------|-------------|
| $\text{HgCl}_2$ | High          | High     | Average loss (%) | 0.57        | 0.11        | 0.11        | 0.10        | ×           |
|                 |               |          | SD (%)           | 0.07        | 0.11        | 0.13        | 0.04        | ×           |
|                 |               |          | RSD              | 12.5        | 95.8        | 122         | 41.7        | ×           |
|                 |               | Low      | Average loss (%) | 0.17        | 0.12        | 0.05        | 0.03        | ×           |
|                 |               |          | SD (%)           | 0.15        | 0.11        | 0.07        | 0.03        | ×           |
|                 |               |          | RSD              | 86.0        | 89.3        | 135         | 96.5        | ×           |
|                 | Low           | High     | Average loss (%) | 3.15        | 0.00        | 0.18        | 0.56        | ×           |
|                 |               |          | SD (%)           | 0.67        | 0.00        | 0.32        | 0.72        | ×           |
|                 |               |          | RSD              | 21.3        | 0.00        | 173         | 130         | ×           |
| $\text{HgBr}_2$ | High          | High     | Average loss (%) | 0.12        | 0.00        | 0.02        | 0.01        | ×           |
|                 |               |          | SD (%)           | 0.05        | 0.01        | 0.01        | 0.01        | ×           |
|                 |               |          | RSD              | 46.0        | 173         | 70.9        | 104         | ×           |
|                 |               | Low      | Average loss (%) | 0.30        | 0.03        | 0.05        | 0.02        | ×           |
|                 |               |          | SD (%)           | 0.22        | 0.04        | 0.03        | 0.02        | ×           |
|                 |               |          | RSD              | 74.8        | 140         | 59.7        | 120         | ×           |
|                 | Low           | High     | Average loss (%) | 2.38        | 0.15        | 0.15        | 0.17        | ×           |
|                 |               |          | SD (%)           | 1.60        | 0.13        | 0.26        | 0.22        | ×           |
|                 |               |          | RSD              | 67.2        | 86.6        | 173         | 129         | ×           |
